# Supplementary material
Source: PubMed Central journal article supplement (PMC4174427)
Supplement: Supp_Fig1.pdf [file Supp_Fig1.pdf]

## Supplementary Data

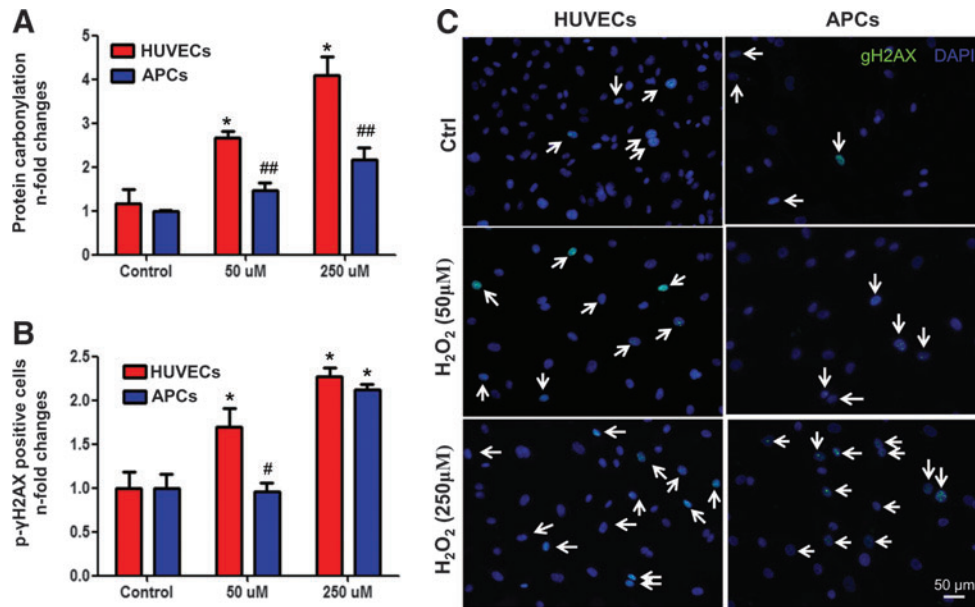

**SUPPLEMENTARY FIG. S1. Adventitia-derived progenitor cell (APC) biomarkers of resiliency to oxidative stress.** (A) Bar graphs showing the amount of protein carbonyl groups, after exposure of cells to different concentrations of  $\text{H}_2\text{O}_2$  (50 and 250  $\mu\text{M}$ ) for 24 h. (B, C) Bar graphs and representative images of phospho- $\gamma\text{H2AX}$  staining. Data are expressed as mean  $\pm$  SEM of triplicates. \* $p < 0.05$  versus control. # $p < 0.05$ ; ## $p < 0.01$  versus human umbilical vein endothelial cell (HUVECs). Scale bar 50  $\mu\text{m}$ .
