# Supplementary material
Source: PubMed Central journal article supplement (PMC4174427)
Supplement: Supp_Fig2.pdf [file Supp_Fig2.pdf]

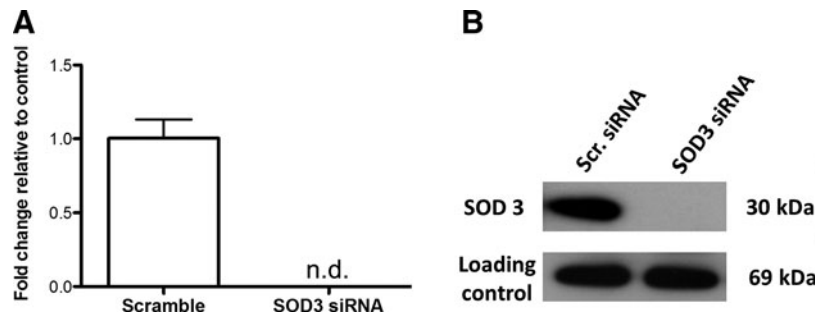

**SUPPLEMENTARY FIG. S2. Effective SOD3 silencing in APCs by siRNA. (A, B) RT-PCR (A) and western blot (B) results showing the effectiveness of SOD3 knockdown in APCs.**
