# Supplementary material
Source: PubMed Central journal article supplement (PMC4174427)
Supplement: Supp_Fig3.pdf [file Supp_Fig3.pdf]

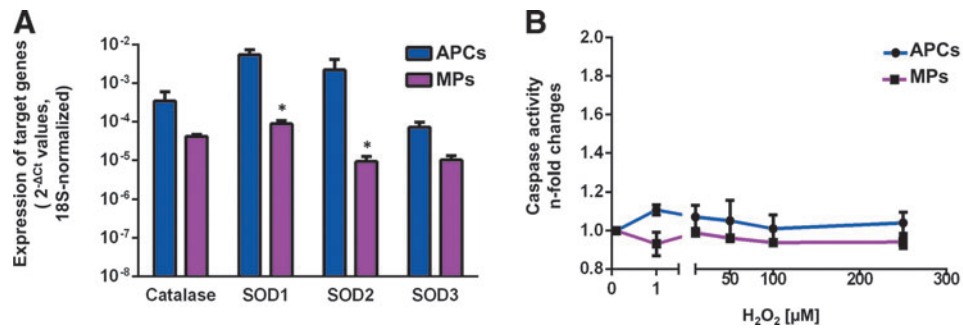

**SUPPLEMENTARY FIG. S3. APCs express higher levels of SOD1 and SOD2 compared with microvascular pericytes from skeletal muscles.** (A) Catalase and superoxide dismutase (SOD) mRNA levels in APCs and muscle pericytes (MPs), as assessed by quantitative PCR: Data are means  $\pm$  SEM of  $n = 3$  biological replicates, \* $p < 0.05$  versus APCs. (B) Effect of H<sub>2</sub>O<sub>2</sub> on apoptosis. APCs and MPs were incubated with the indicated doses of H<sub>2</sub>O<sub>2</sub> for 24 h. Apoptosis, as detected by Caspase 3/7 activity assay, remains constant in the two cell types. Each point is the mean  $\pm$  SEM of three independent experiments.
