# Supplementary material
Source: PubMed Central journal article supplement (PMC4174427)
Supplement: Supp_Fig5.pdf [file Supp_Fig5.pdf]

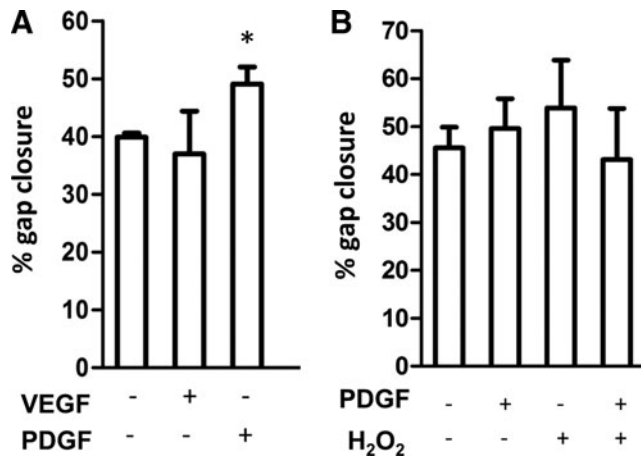

**SUPPLEMENTARY FIG. S5. Platelet-derived growth factor (PDGF) stimulates APC migration, while no significant effect is exerted in microvascular pericytes. (A)** Representative bar graphs of the percentage of APC gap closure after stimulation with PDGF or vascular endothelial growth factor (VEGF) (both at 100 ng/ml): PDGF is a stronger stimulus than VEGF for APC migration. Values are means  $\pm$  SEM of three independent experiments, \* $p < 0.05$  versus untreated cells. **(B)** Representative histograms of migration of microvascular muscle pericytes (MPs) in response to PDGF (100 ng/ml), in the presence and absence of H<sub>2</sub>O<sub>2</sub> (250  $\mu$ M): Neither PDGF nor H<sub>2</sub>O<sub>2</sub> significantly affected MPs migration. Values are means  $\pm$  SEM of four independent experiments.
