# Supplementary material
Source: PubMed Central journal article supplement (PMC4174427)
Supplement: Supp_Fig6.pdf [file Supp_Fig6.pdf]

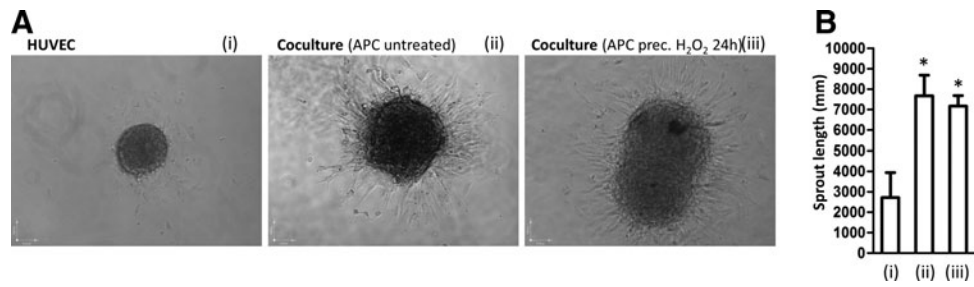

**SUPPLEMENTARY FIG. S6. Oxidative stress does not impair the APC capacity to improve endothelial sprouting.** (A) Three dimensional *in vitro* angiogenesis with collagen gel-embedded spheroids of HUVECs and APCs. HUVEC spheroids (i) have a low baseline sprouting activity, which is strongly stimulated by coculture with APCs (ii). APCs preconditioned with H<sub>2</sub>O<sub>2</sub> (iii) did not impair their capacity to stimulate HUVEC sprouting. (B) The cumulative length of all the sprouts originating from an individual spheroid was quantified after 24 h by semiautomatic image analysis. The means  $\pm$  SEM of three independent experiments was calculated by measuring the average cumulative sprout length of 10 individual spheroids per experimental group; \* $p < 0.05$  versus HUVECs alone.
